# Supplementary material for: Multi-Responsive Optimization of Novel pH-Sensitive Hydrogel Beads Based on Basil Seed Mucilage, Alginate, and Magnetic Particles
Source: MDPI journal article supplement (doi:10.3390/gels8050274), 2022-04-27
Supplement: s1 [file s1]

Article

# Multi-Responsive Optimization of Novel pH-Sensitive Hydrogel Beads Based on Basil Seed Mucilage, Alginate, and Magnetic Particles

Natwat Srikhao <sup>1</sup>, Korrapat Chirochrapas <sup>1</sup>, Nessaraporn Kwansanei <sup>1</sup>, Pornnapa Kasemsiri <sup>1,\*</sup>, Artjima Ounkaew <sup>1</sup>, Manunya Okhawilai <sup>2,3,\*</sup>, Chutiwat Likitaporn <sup>4</sup>, Somnuk Theerakulpisut <sup>5</sup> and Hiroshi Uyama <sup>6</sup>

## Supplementary information

### Preparation of BSM

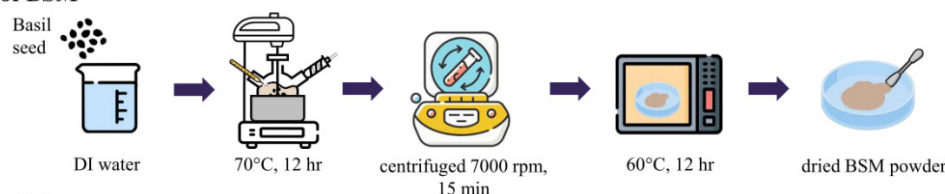

### Preparation of MPs

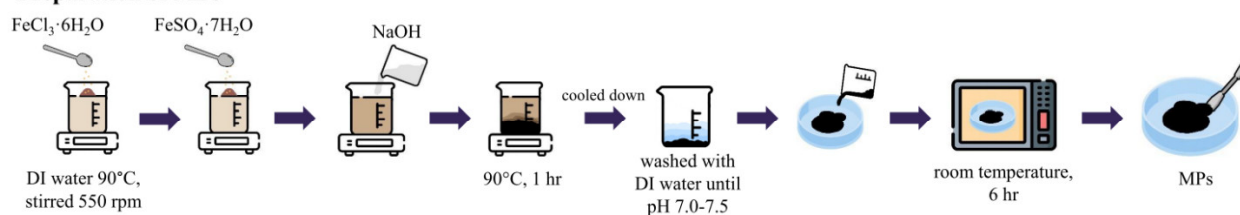

### Hydrogel bead preparation

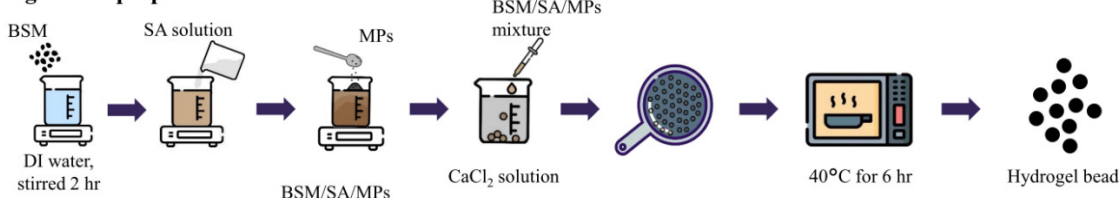

**Scheme 1.** Overall steps for hydrogel bead preparation.

**Table S1.** The properties for Grey relational coefficient calculation for the L16 comparability sequences.

| Experimental design No. | Gray relational Coefficient |                     |                    |                    | Drug loading | Swelling | Grey relational grade |
|-------------------------|-----------------------------|---------------------|--------------------|--------------------|--------------|----------|-----------------------|
|                         | pH 1.2 drug release         | pH 7.4 drug release | pH 1.2 antioxidant | pH 7.4 antioxidant |              |          |                       |
| 1                       | 0.896                       | 0.353               | 0.605              | 0.390              | 0.334        | 0.436    | 0.502                 |
| 2                       | 0.877                       | 0.339               | 0.666              | 0.342              | 0.334        | 0.413    | 0.495                 |
| 3                       | 1.000                       | 0.402               | 0.333              | 0.403              | 0.334        | 0.751    | 0.537                 |
| 4                       | 0.947                       | 0.366               | 0.833              | 0.970              | 0.334        | 0.636    | 0.681                 |
| 5                       | 0.527                       | 0.333               | 0.700              | 0.401              | 0.334        | 0.333    | 0.438                 |
| 6                       | 0.397                       | 0.354               | 0.889              | 0.337              | 0.334        | 0.400    | 0.452                 |
| 7                       | 0.444                       | 0.601               | 0.310              | 0.519              | 0.334        | 1.000    | 0.535                 |
| 8                       | 0.477                       | 0.369               | 0.627              | 0.356              | 0.334        | 0.806    | 0.495                 |
| 9                       | 0.538                       | 0.343               | 0.699              | 0.415              | 0.334        | 0.343    | 0.445                 |
| 10                      | 0.458                       | 0.366               | 0.314              | 0.409              | 0.334        | 0.549    | 0.405                 |
| 11                      | 0.478                       | 0.476               | 0.527              | 0.333              | 0.333        | 0.389    | 0.423                 |
| 12                      | 0.403                       | 0.358               | 0.509              | 0.429              | 0.334        | 0.458    | 0.415                 |
| 13                      | 0.402                       | 0.363               | 0.521              | 0.376              | 0.334        | 0.511    | 0.418                 |
| 14                      | 0.439                       | 0.472               | 0.416              | 0.632              | 0.334        | 0.640    | 0.489                 |
| 15                      | 0.383                       | 0.354               | 0.451              | 0.345              | 0.334        | 0.448    | 0.386                 |
| 16                      | 0.333                       | 1.000               | 1.000              | 1.000              | 0.333        | 0.556    | 0.704                 |

**Table S2.** Sol fraction of the hydrogel beads.

| Experimental design No. | Sol fraction (%) | SD   |
|-------------------------|------------------|------|
| 1                       | 49.55            | 5.51 |
| 2                       | 45.29            | 2.06 |
| 3                       | 40.75            | 6.66 |
| 4                       | 38.28            | 4.80 |
| 5                       | 31.96            | 5.83 |
| 6                       | 36.50            | 6.05 |
| 7                       | 22.23            | 1.00 |
| 8                       | 32.89            | 1.60 |
| 9                       | 17.52            | 0.11 |
| 10                      | 13.33            | 2.14 |
| 11                      | 30.27            | 1.92 |
| 12                      | 30.43            | 3.67 |
| 13                      | 7.05             | 1.40 |
| 14                      | 21.23            | 2.39 |
| 15                      | 15.46            | 5.83 |
| 16                      | 23.26            | 2.80 |

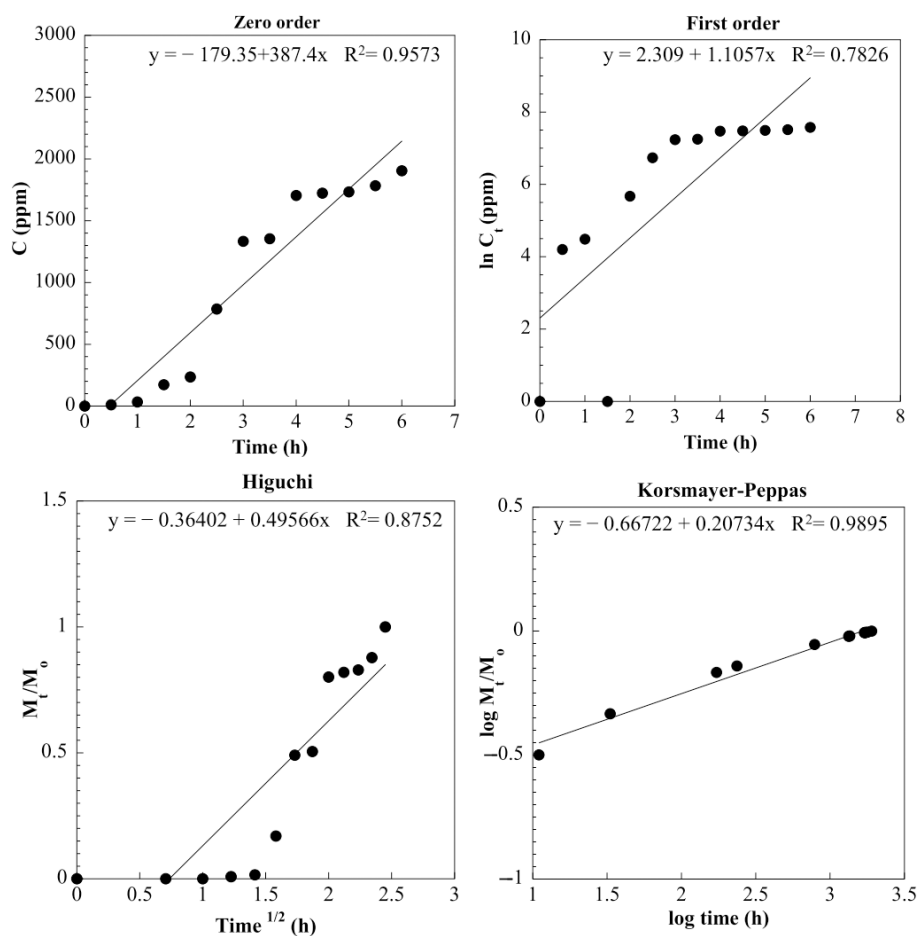

Figure S1. shows the release profiles obtained using the four mathematical models.
